# Supplementary material
Source: publisher figshare collection journal article supplement (https://tandf.figshare.com/articles/dataset/_/9959759)
Supplement: Supplementary file 1 [file 2]

# Yield, content, and nutrient uptake by winter wheat and spring barley in response to applications of digestate, cattle slurry, and NPK mineral fertilizers

Przemysław Barłóg Lukáš Hlisnikovský and Eva Kunzová

## Supplemental material

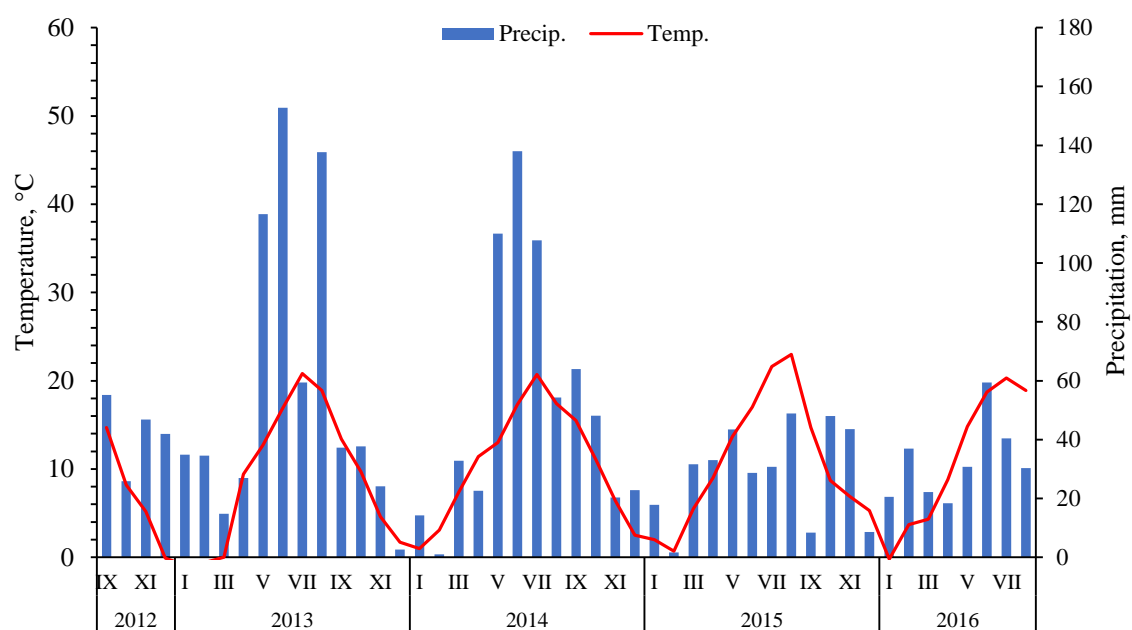

Figure S1. Mean monthly air temperature and sum of precipitation during 2012–2016 growing seasons of winter wheat and spring barley. Prague-Ruzyně Meteorological Station.

Table S1. Effect of the year and fertilization treatments on total aboveground dry matter (TDM) and harvest index (HI) of winter wheat (WW) and spring barley (SB)

| Parameter               | Treatment | Year / crop           |                       |                         |                       | Mean for WW            |
|-------------------------|-----------|-----------------------|-----------------------|-------------------------|-----------------------|------------------------|
|                         |           | 2013/WW               | 2014/WW               | 2015/SB                 | 2016/WW               |                        |
| TDM, t ha <sup>-1</sup> | Control   | 11.5±0.3 <sup>b</sup> | 10.4±0.2 <sup>b</sup> | 8.1±0.1 <sup>c</sup>    | 8.5±0.4 <sup>b</sup>  | 10.1±0.4 <sup>c</sup>  |
|                         | Dig       | 15.4±0.5 <sup>a</sup> | 17.9±0.5 <sup>a</sup> | 12.9±0.2 <sup>ab</sup>  | 16.5±0.4 <sup>a</sup> | 16.6±0.4 <sup>a</sup>  |
|                         | Dig+S     | 14.7±0.5 <sup>a</sup> | 16.7±0.3 <sup>a</sup> | 12.8±0.1 <sup>ab</sup>  | 15.6±0.4 <sup>a</sup> | 15.7±0.3 <sup>b</sup>  |
|                         | Csl       | 14.9±0.5 <sup>a</sup> | 17.9±0.3 <sup>a</sup> | 12.6±0.2 <sup>b</sup>   | 15.9±0.5 <sup>a</sup> | 16.2±0.4 <sup>ab</sup> |
|                         | NPK       | 13.8±0.4 <sup>a</sup> | 17.8±0.2 <sup>a</sup> | 13.5±0.1 <sup>a</sup>   | 15.4±0.3 <sup>a</sup> | 15.7±0.5 <sup>b</sup>  |
| HI, %                   | Control   | 58.0±0.7              | 54.9±1.0              | 60.4±0.7 <sup>ab</sup>  | 58.4±0.8              | 57.1±0.7               |
|                         | Dig       | 55.3±1.2              | 55.2±0.9              | 57.6±0.5 <sup>bc</sup>  | 58.8±0.6              | 56.5±0.7               |
|                         | Dig+S     | 56.6±0.9              | 55.9±0.4              | 60.5±0.4 <sup>a</sup>   | 59.6±0.7              | 57.4±0.6               |
|                         | Csl       | 55.9±1.3              | 54.3±0.3              | 59.1±1.0 <sup>abc</sup> | 59.8±1.1              | 56.7±0.9               |
|                         | NPK       | 56.5±0.8              | 54.9±0.6              | 56.8±0.4 <sup>c</sup>   | 60.5±0.4              | 57.3±0.8               |

Treatments with the standard errors of the mean (*SEM*) followed by the same letter were not significantly different at 0.05 probability level.

Table S2. Effect of fertilization treatments on nutrient content of grain depending on the year and crop: WW – winter wheat; SB – spring barley

| Year/crop | Treatment | Macronutrients + sodium, g kg <sup>-1</sup> |                          |                          |                          |                          |            | Micronutrients, g kg <sup>-1</sup> |                         |                         |                         |                         |
|-----------|-----------|---------------------------------------------|--------------------------|--------------------------|--------------------------|--------------------------|------------|------------------------------------|-------------------------|-------------------------|-------------------------|-------------------------|
|           |           | N                                           | P                        | K                        | Mg                       | S                        | Ca         | Na                                 | Zn                      | Cu                      | Mn                      | Fe                      |
| 2013/WW   | Control   | 18.0 ±0.35 <sup>c</sup>                     | 3.66 ±0.07               | 3.98 ±0.06 <sup>a</sup>  | 1.18 ±0.02               | 1.20 ±0.01 <sup>b</sup>  | 1.36 ±0.01 | 0.10 ±0.002                        | 24.6 ±0.3 <sup>c</sup>  | 4.56 ±0.04 <sup>b</sup> | 40.3 ±0.4 <sup>b</sup>  | 31.4 ±0.6 <sup>b</sup>  |
|           | Dig       | 20.8 ±0.07 <sup>b</sup>                     | 3.59 ±0.05               | 3.57 ±0.05 <sup>b</sup>  | 1.27 ±0.03               | 1.45 ±0.01 <sup>a</sup>  | 1.34 ±0.03 | 0.09 ±0.003                        | 33.0 ±1.3 <sup>a</sup>  | 5.14 ±0.05 <sup>a</sup> | 45.1 ±0.5 <sup>a</sup>  | 38.6 ±0.9 <sup>a</sup>  |
|           | Dig+S     | 22.3 ±0.28 <sup>a</sup>                     | 3.82 ±0.08               | 3.72 ±0.06 <sup>b</sup>  | 1.25 ±0.01               | 1.41 ±0.01 <sup>a</sup>  | 1.33 ±0.02 | 0.09 ±0.002                        | 30.3 ±0.7 <sup>ab</sup> | 5.06 ±0.09 <sup>a</sup> | 43.4 ±0.4 <sup>a</sup>  | 38.1 ±0.8 <sup>a</sup>  |
|           | Csl       | 21.4 ±0.16 <sup>ab</sup>                    | 3.65 ±0.07               | 3.53 ±0.05 <sup>b</sup>  | 1.26 ±0.03               | 1.43 ±0.01 <sup>a</sup>  | 1.32 ±0.02 | 0.09 ±0.002                        | 31.3 ±0.6 <sup>ab</sup> | 5.12 ±0.08 <sup>a</sup> | 43.8 ±0.3 <sup>a</sup>  | 38.2 ±0.3 <sup>a</sup>  |
|           | NPK       | 21.6 ±0.20 <sup>ab</sup>                    | 3.84 ±0.05               | 3.75 ±0.06 <sup>b</sup>  | 1.26 ±0.03               | 1.41 ±0.01 <sup>a</sup>  | 1.36 ±0.03 | 0.09 ±0.003                        | 29.5 ±0.4 <sup>b</sup>  | 5.14 ±0.07 <sup>a</sup> | 44.5 ±0.8 <sup>a</sup>  | 37.4 ±0.6 <sup>a</sup>  |
| 2014/WW   | Control   | 10.6 ±0.27 <sup>b</sup>                     | 3.43 ±0.04               | 4.35 ±0.06               | 1.08 ±0.01               | 0.84 ±0.01 <sup>b</sup>  | 0.73 ±0.00 | 0.10 ±0.002                        | 17.1 ±0.2 <sup>b</sup>  | 2.55 ±0.06 <sup>b</sup> | 33.3 ±0.5               | 25.7 ±4.0               |
|           | Dig       | 15.8 ±0.40 <sup>a</sup>                     | 3.40 ±0.04               | 4.19 ±0.04               | 1.07 ±0.01               | 1.13 ±0.01 <sup>a</sup>  | 0.73 ±0.01 | 0.10 ±0.003                        | 20.5 ±0.2 <sup>a</sup>  | 3.20 ±0.03 <sup>a</sup> | 33.0 ±0.4               | 31.3 ±5.0               |
|           | Dig+S     | 13.5 ±1.05 <sup>a</sup>                     | 3.45 ±0.02               | 4.27 ±0.08               | 1.08 ±0.01               | 0.92 ±0.02 <sup>b</sup>  | 0.73 ±0.02 | 0.10 ±0.003                        | 18.9 ±0.5 <sup>ab</sup> | 2.82 ±0.08 <sup>b</sup> | 35.4 ±1.8               | 23.7 ±0.1               |
|           | Csl       | 15.2 ±0.41 <sup>a</sup>                     | 3.46 ±0.07               | 4.26 ±0.07               | 1.08 ±0.02               | 1.03 ±0.02 <sup>a</sup>  | 0.73 ±0.01 | 0.10 ±0.001                        | 19.5 ±0.5 <sup>a</sup>  | 3.16 ±0.06 <sup>a</sup> | 34.5 ±1.3               | 26.2 ±0.8               |
|           | NPK       | 15.1 ±0.11 <sup>a</sup>                     | 3.58 ±0.18               | 4.39 ±0.24               | 1.10 ±0.03               | 1.03 ±0.03 <sup>a</sup>  | 0.72 ±0.01 | 0.09 ±0.001                        | 19.2 ±0.6 <sup>a</sup>  | 3.14 ±0.09 <sup>a</sup> | 35.8 ±1.3               | 28.3 ±2.0               |
| 2015/SB   | Control   | 12.4 ±0.39 <sup>d</sup>                     | 3.19 ±0.03               | 4.83 ±0.04               | 1.26 ±0.01               | 0.95 ±0.02 <sup>d</sup>  | 1.00 ±0.02 | 0.13 ±0.001 <sup>c</sup>           | 22.9 ±0.1 <sup>c</sup>  | 4.33 ±0.06 <sup>b</sup> | 12.1 ±0.1               | 25.6 ±0.4 <sup>c</sup>  |
|           | Dig       | 18.4 ±0.37 <sup>a</sup>                     | 3.14 ±0.05               | 4.99 ±0.14               | 1.29 ±0.03               | 1.25 ±0.02 <sup>a</sup>  | 1.02 ±0.03 | 0.17 ±0.010 <sup>a</sup>           | 29.8 ±1.2 <sup>a</sup>  | 5.53 ±0.16 <sup>a</sup> | 12.6 ±0.6               | 34.0 ±1.3 <sup>a</sup>  |
|           | Dig+S     | 15.0 ±0.24 <sup>c</sup>                     | 3.19 ±0.07               | 4.98 ±0.06               | 1.24 ±0.02               | 1.07 ±0.01 <sup>c</sup>  | 0.97 ±0.01 | 0.14 ±0.004 <sup>bc</sup>          | 26.2 ±0.6 <sup>bc</sup> | 5.07 ±0.12 <sup>a</sup> | 11.7 ±0.2               | 29.8 ±1.0 <sup>bc</sup> |
|           | Csl       | 16.9 ±0.29 <sup>b</sup>                     | 3.16 ±0.04               | 4.93 ±0.07               | 1.25 ±0.01               | 1.18 ±0.01 <sup>b</sup>  | 0.97 ±0.02 | 0.15 ±0.004 <sup>bc</sup>          | 27.1 ±0.3 <sup>ab</sup> | 5.07 ±0.04 <sup>a</sup> | 11.7 ±0.3               | 31.0 ±0.6 <sup>ab</sup> |
|           | NPK       | 18.1 ±0.32 <sup>ab</sup>                    | 3.12 ±0.05               | 4.89 ±0.14               | 1.27 ±0.00               | 1.18 ±0.01 <sup>b</sup>  | 0.98 ±0.01 | 0.16 ±0.006 <sup>ab</sup>          | 26.9 ±1.1 <sup>ab</sup> | 5.56 ±0.14 <sup>a</sup> | 12.5 ±0.2               | 32.0 ±0.7 <sup>ab</sup> |
| 2016/WW   | Control   | 11.2 ±0.18 <sup>c</sup>                     | 3.23 ±0.03 <sup>a</sup>  | 4.13 ±0.04 <sup>a</sup>  | 1.04 ±0.02 <sup>ab</sup> | 0.86 ±0.02 <sup>c</sup>  | 0.56 ±0.01 | 0.07 ±0.002 <sup>b</sup>           | 16.1 ±0.2 <sup>ab</sup> | 2.98 ±0.05 <sup>b</sup> | 33.6 ±0.4 <sup>ab</sup> | 26.7 ±0.5 <sup>b</sup>  |
|           | Dig       | 17.1 ±0.48 <sup>a</sup>                     | 2.98 ±0.05 <sup>bc</sup> | 3.41 ±0.05 <sup>bc</sup> | 1.05 ±0.01 <sup>a</sup>  | 1.24 ±0.02 <sup>a</sup>  | 0.57 ±0.01 | 0.11 ±0.010 <sup>a</sup>           | 17.6 ±0.4 <sup>a</sup>  | 3.64 ±0.06 <sup>a</sup> | 32.2 ±0.5 <sup>ab</sup> | 32.7 ±0.8 <sup>a</sup>  |
|           | Dig+S     | 15.6 ±0.32 <sup>b</sup>                     | 3.13 ±0.08 <sup>ab</sup> | 3.57 ±0.06 <sup>b</sup>  | 1.04 ±0.01 <sup>ab</sup> | 1.14 ±0.01 <sup>b</sup>  | 0.55 ±0.02 | 0.07 ±0.004 <sup>b</sup>           | 17.4 ±0.6 <sup>a</sup>  | 3.53 ±0.08 <sup>a</sup> | 32.9 ±1.6 <sup>ab</sup> | 31.2 ±1.4 <sup>a</sup>  |
|           | Csl       | 16.0 ±0.39 <sup>ab</sup>                    | 3.18 ±0.06 <sup>ab</sup> | 3.65 ±0.06 <sup>ba</sup> | 1.08 ±0.01 <sup>a</sup>  | 1.19 ±0.02 <sup>ab</sup> | 0.57 ±0.00 | 0.07 ±0.002 <sup>b</sup>           | 17.9 ±0.7 <sup>a</sup>  | 3.67 ±0.03 <sup>a</sup> | 35.3 ±1.3 <sup>a</sup>  | 32.6 ±0.6 <sup>a</sup>  |
|           | NPK       | 16.8 ±0.25 <sup>ab</sup>                    | 2.81 ±0.05 <sup>c</sup>  | 3.26 ±0.07 <sup>c</sup>  | 0.98 ±0.02 <sup>b</sup>  | 1.18 ±0.01 <sup>ab</sup> | 0.52 ±0.02 | 0.07 ±0.003 <sup>b</sup>           | 14.5 ±0.6 <sup>b</sup>  | 3.16 ±0.08 <sup>b</sup> | 28.9 ±1.9 <sup>b</sup>  | 29.4 ±0.8 <sup>ab</sup> |
| mean/WW   | Control   | 13.3 ±1.03 <sup>b</sup>                     | 3.44 ±0.06               | 4.15 ±0.05 <sup>a</sup>  | 1.10 ±0.02               | 0.96 ±0.05 <sup>d</sup>  | 0.88 ±0.10 | 0.09 ±0.004 <sup>b</sup>           | 19.3 ±1.2 <sup>d</sup>  | 3.36 ±0.26 <sup>c</sup> | 35.7 ±1.0               | 27.9 ±1.4 <sup>b</sup>  |
|           | Dig       | 17.9 ±0.66 <sup>a</sup>                     | 3.33 ±0.08               | 3.72 ±0.10 <sup>b</sup>  | 1.13 ±0.03               | 1.27 ±0.04 <sup>a</sup>  | 0.88 ±0.10 | 0.10 ±0.004 <sup>a</sup>           | 23.7 ±2.1 <sup>a</sup>  | 3.99 ±0.25 <sup>a</sup> | 36.7 ±1.8               | 34.2 ±1.8 <sup>a</sup>  |
|           | Dig+S     | 17.1 ±1.19 <sup>a</sup>                     | 3.47 ±0.09               | 3.85 ±0.10 <sup>b</sup>  | 1.12 ±0.03               | 1.16 ±0.06 <sup>c</sup>  | 0.87 ±0.10 | 0.09 ±0.004 <sup>b</sup>           | 22.2 ±1.8 <sup>bc</sup> | 3.80 ±0.28 <sup>b</sup> | 37.2 ±1.5               | 31.0 ±1.8 <sup>ab</sup> |
|           | Csl       | 17.5 ±0.85 <sup>a</sup>                     | 3.43 ±0.07               | 3.81 ±0.10 <sup>b</sup>  | 1.14 ±0.03               | 1.22 ±0.05 <sup>b</sup>  | 0.87 ±0.10 | 0.09 ±0.004 <sup>b</sup>           | 22.9 ±1.8 <sup>ab</sup> | 3.98 ±0.25 <sup>a</sup> | 37.9 ±1.4               | 32.3 ±1.5 <sup>a</sup>  |
|           | NPK       | 17.8 ±0.84 <sup>a</sup>                     | 3.41 ±0.14               | 3.80 ±0.16 <sup>b</sup>  | 1.11 ±0.04               | 1.21 ±0.05 <sup>b</sup>  | 0.87 ±0.11 | 0.08 ±0.004 <sup>b</sup>           | 21.1 ±1.9 <sup>b</sup>  | 3.81 ±0.29 <sup>b</sup> | 36.4 ±2.0               | 31.7 ±1.4 <sup>ab</sup> |

Treatments with the standard errors of the mean (*SEM*) followed by the same letter were not significantly different at 0.05 probability level.

Table S3. Effect of fertilization treatments on nutrient content of straw depending on the year and crop: WW – winter wheat; SB – spring barley

| Year/crop | Treatment | Macronutrients + sodium, g kg <sup>-1</sup> |                          |                          |                          |                          |                          |                           | Micronutrients, g kg <sup>-1</sup> |                          |                         |                         |
|-----------|-----------|---------------------------------------------|--------------------------|--------------------------|--------------------------|--------------------------|--------------------------|---------------------------|------------------------------------|--------------------------|-------------------------|-------------------------|
|           |           | N                                           | P                        | K                        | Mg                       | S                        | Ca                       | Na                        | Zn                                 | Cu                       | Mn                      | Fe                      |
| 2013/WW   | Control   | 2.43 ±0.08 <sup>b</sup>                     | 0.43 ±0.02 <sup>b</sup>  | 6.19 ±0.27 <sup>b</sup>  | 0.61 ±0.00 <sup>b</sup>  | 0.46 ±0.01 <sup>b</sup>  | 3.30 ±0.07 <sup>b</sup>  | 0.11 ±0.001               | 5.8 ±0.4 <sup>c</sup>              | 2.09 ±0.03 <sup>b</sup>  | 26.3 ±0.6               | 72.5 ±7.3 <sup>a</sup>  |
|           | Dig       | 3.90 ±0.41 <sup>a</sup>                     | 0.64 ±0.08 <sup>a</sup>  | 7.93 ±0.49 <sup>ab</sup> | 0.70 ±0.02 <sup>a</sup>  | 0.62 ±0.05 <sup>a</sup>  | 3.50 ±0.05 <sup>ab</sup> | 0.11 ±0.003               | 9.3 ±0.6 <sup>ab</sup>             | 2.39 ±0.08 <sup>a</sup>  | 25.3 ±2.2               | 53.3 ±4.3 <sup>ab</sup> |
|           | Dig+S     | 3.90 ±0.25 <sup>a</sup>                     | 0.67 ±0.04 <sup>a</sup>  | 8.28 ±0.67 <sup>a</sup>  | 0.69 ±0.01 <sup>a</sup>  | 0.63 ±0.05 <sup>a</sup>  | 3.49 ±0.09 <sup>ab</sup> | 0.11 ±0.002               | 9.8 ±0.9 <sup>ab</sup>             | 2.49 ±0.11 <sup>a</sup>  | 24.6 ±0.1               | 51.9 ±2.7 <sup>ab</sup> |
|           | Csl       | 3.82 ±0.20 <sup>a</sup>                     | 0.66 ±0.05 <sup>a</sup>  | 8.61 ±0.26 <sup>a</sup>  | 0.70 ±0.01 <sup>a</sup>  | 0.64 ±0.03 <sup>a</sup>  | 3.61 ±0.07 <sup>a</sup>  | 0.11 ±0.003               | 11.3 ±0.9 <sup>a</sup>             | 2.47 ±0.04 <sup>a</sup>  | 25.6 ±1.6               | 47.0 ±0.6 <sup>b</sup>  |
|           | NPK       | 3.54 ±0.10 <sup>a</sup>                     | 0.60 ±0.02 <sup>ab</sup> | 7.44 ±0.19 <sup>ab</sup> | 0.67 ±0.01 <sup>a</sup>  | 0.54 ±0.02 <sup>ab</sup> | 3.46 ±0.00 <sup>ab</sup> | 0.12 ±0.004               | 7.2 ±0.7 <sup>bc</sup>             | 2.30 ±0.01 <sup>ab</sup> | 25.2 ±0.4               | 52.6 ±6.0 <sup>ab</sup> |
| 2014/WW   | Control   | 2.06 ±0.13 <sup>b</sup>                     | 0.43 ±0.02 <sup>a</sup>  | 4.68 ±0.03 <sup>b</sup>  | 0.61 ±0.01 <sup>a</sup>  | 0.53 ±0.02 <sup>a</sup>  | 2.78 ±0.12               | 0.11 ±0.004               | 6.4 ±0.6                           | 1.90 ±0.13               | 45.0 ±1.8 <sup>a</sup>  | 71.9 ±8.6               |
|           | Dig       | 2.76 ±0.20 <sup>a</sup>                     | 0.34 ±0.04 <sup>ab</sup> | 6.51 ±0.30 <sup>a</sup>  | 0.52 ±0.01 <sup>b</sup>  | 0.46 ±0.03 <sup>ab</sup> | 2.91 ±0.16               | 0.15 ±0.035               | 7.3 ±0.7                           | 2.02 ±0.16               | 30.1 ±0.8 <sup>b</sup>  | 68.7 ±13.2              |
|           | Dig+S     | 2.38 ±0.08 <sup>ab</sup>                    | 0.35 ±0.02 <sup>ab</sup> | 5.90 ±0.12 <sup>a</sup>  | 0.52 ±0.01 <sup>b</sup>  | 0.42 ±0.01 <sup>b</sup>  | 2.66 ±0.09               | 0.12 ±0.012               | 6.3 ±0.8                           | 1.93 ±0.03               | 34.0 ±2.3 <sup>b</sup>  | 48.4 ±7.7               |
|           | Csl       | 2.43 ±0.10 <sup>ab</sup>                    | 0.32 ±0.02 <sup>b</sup>  | 6.14 ±0.27 <sup>a</sup>  | 0.55 ±0.01 <sup>b</sup>  | 0.43 ±0.01 <sup>b</sup>  | 3.07 ±0.04               | 0.12 ±0.004               | 5.6 ±0.5                           | 2.24 ±0.24               | 33.7 ±1.6 <sup>b</sup>  | 49.7 ±1.1               |
|           | NPK       | 2.52 ±0.06 <sup>ab</sup>                    | 0.30 ±0.02 <sup>b</sup>  | 6.05 ±0.04 <sup>a</sup>  | 0.47 ±0.00 <sup>c</sup>  | 0.41 ±0.00 <sup>b</sup>  | 2.78 ±0.05               | 0.11 ±0.006               | 5.4 ±0.5                           | 2.01 ±0.06               | 29.6 ±1.3 <sup>b</sup>  | 40.7 ±5.7               |
| 2015/SB   | Control   | 2.69 ±0.06 <sup>c</sup>                     | 0.43 ±0.04               | 12.4 ±0.60 <sup>c</sup>  | 0.67 ±0.02 <sup>ab</sup> | 0.90 ±0.03 <sup>a</sup>  | 4.68 ±0.14 <sup>ab</sup> | 0.52 ±0.050 <sup>c</sup>  | 3.9 ±0.1 <sup>b</sup>              | 1.98 ±0.08 <sup>d</sup>  | 13.1 ±0.8               | 16.9 ±0.5               |
|           | Dig       | 5.80 ±0.47 <sup>a</sup>                     | 0.42 ±0.05               | 21.7 ±0.98 <sup>a</sup>  | 0.74 ±0.03 <sup>a</sup>  | 0.82 ±0.05 <sup>ab</sup> | 4.84 ±0.14 <sup>a</sup>  | 1.99 ±0.168 <sup>a</sup>  | 6.6 ±0.4 <sup>a</sup>              | 2.81 ±0.07 <sup>a</sup>  | 14.7 ±0.9               | 20.2 ±0.5               |
|           | Dig+S     | 3.52 ±0.27 <sup>bc</sup>                    | 0.36 ±0.03               | 19.1 ±0.53 <sup>ab</sup> | 0.63 ±0.01 <sup>b</sup>  | 0.63 ±0.02 <sup>c</sup>  | 4.34 ±0.07 <sup>b</sup>  | 1.32 ±0.119 <sup>b</sup>  | 5.3 ±0.6 <sup>ab</sup>             | 2.14 ±0.07 <sup>cd</sup> | 11.5 ±0.2               | 16.8 ±1.6               |
|           | Csl       | 4.57 ±0.18 <sup>b</sup>                     | 0.32 ±0.02               | 17.3 ±0.59 <sup>b</sup>  | 0.69 ±0.02 <sup>ab</sup> | 0.73 ±0.02 <sup>bc</sup> | 4.41 ±0.05 <sup>ab</sup> | 1.43 ±0.141 <sup>b</sup>  | 5.7 ±0.4 <sup>a</sup>              | 2.55 ±0.06 <sup>ab</sup> | 14.8 ±0.8               | 16.8 ±0.3               |
|           | NPK       | 4.21 ±0.18 <sup>b</sup>                     | 0.32 ±0.02               | 19.0 ±0.35 <sup>ab</sup> | 0.72 ±0.02 <sup>a</sup>  | 0.65 ±0.01 <sup>c</sup>  | 4.64 ±0.08 <sup>ab</sup> | 1.77 ±0.047 <sup>ab</sup> | 4.9 ±0.4 <sup>ab</sup>             | 2.37 ±0.05 <sup>bc</sup> | 14.4 ±1.1               | 19.3 ±1.4               |
| 2016/WW   | Control   | 1.66 ±0.04 <sup>b</sup>                     | 0.28 ±0.02 <sup>a</sup>  | 6.04 ±0.14 <sup>b</sup>  | 0.59 ±0.01               | 0.47 ±0.02 <sup>ab</sup> | 1.73 ±0.05 <sup>b</sup>  | 0.08 ±0.001 <sup>c</sup>  | 4.1 ±0.1 <sup>a</sup>              | 1.36 ±0.02 <sup>b</sup>  | 38.4 ±1.1 <sup>a</sup>  | 22.3 ±1.9               |
|           | Dig       | 2.39 ±0.12 <sup>a</sup>                     | 0.19 ±0.01 <sup>b</sup>  | 10.05 ±0.55 <sup>a</sup> | 0.59 ±0.01               | 0.49 ±0.04 <sup>ab</sup> | 1.99 ±0.05 <sup>a</sup>  | 0.12 ±0.012 <sup>a</sup>  | 3.2 ±0.2 <sup>ab</sup>             | 1.69 ±0.03 <sup>a</sup>  | 26.9 ±0.9 <sup>c</sup>  | 20.4 ±1.6               |
|           | Dig+S     | 2.26 ±0.15 <sup>a</sup>                     | 0.23 ±0.02 <sup>ab</sup> | 9.50 ±0.24 <sup>a</sup>  | 0.60 ±0.01               | 0.45 ±0.03 <sup>b</sup>  | 1.99 ±0.05 <sup>a</sup>  | 0.11 ±0.004 <sup>ab</sup> | 3.4 ±0.1 <sup>ab</sup>             | 1.60 ±0.03 <sup>a</sup>  | 29.6 ±0.7 <sup>bc</sup> | 18.9 ±0.8               |
|           | Csl       | 2.40 ±0.17 <sup>a</sup>                     | 0.24 ±0.01 <sup>ab</sup> | 9.34 ±0.62 <sup>a</sup>  | 0.62 ±0.01               | 0.59 ±0.05 <sup>a</sup>  | 2.17 ±0.08 <sup>a</sup>  | 0.09 ±0.009 <sup>bc</sup> | 3.9 ±0.5 <sup>ab</sup>             | 1.71 ±0.04 <sup>a</sup>  | 32.5 ±0.6 <sup>b</sup>  | 21.5 ±1.0               |
|           | NPK       | 2.33 ±0.07 <sup>a</sup>                     | 0.19 ±0.01 <sup>a</sup>  | 9.07 ±0.05 <sup>a</sup>  | 0.60 ±0.01               | 0.42 ±0.01 <sup>b</sup>  | 2.10 ±0.05 <sup>a</sup>  | 0.10 ±0.004 <sup>ab</sup> | 3.0 ±0.1 <sup>b</sup>              | 1.63 ±0.04 <sup>a</sup>  | 33.7 ±2.0 <sup>ab</sup> | 21.4 ±1.4               |
| mean/WW   | Control   | 2.05 ±0.11 <sup>b</sup>                     | 0.38 ±0.02               | 5.64 ±0.22 <sup>b</sup>  | 0.60 ±0.01 <sup>ab</sup> | 0.49 ±0.01 <sup>ab</sup> | 2.60 ±0.20 <sup>c</sup>  | 0.10 ±0.005 <sup>b</sup>  | 5.4 ±0.4 <sup>bc</sup>             | 1.78 ±0.10 <sup>b</sup>  | 36.6 ±2.4 <sup>a</sup>  | 55.6 ±7.9 <sup>a</sup>  |
|           | Dig       | 3.01 ±0.24 <sup>a</sup>                     | 0.39 ±0.06               | 8.16 ±0.50 <sup>a</sup>  | 0.60 ±0.02 <sup>ab</sup> | 0.53 ±0.03 <sup>ab</sup> | 2.80 ±0.19 <sup>ab</sup> | 0.13 ±0.013 <sup>a</sup>  | 6.6 ±0.8 <sup>ab</sup>             | 2.03 ±0.10 <sup>a</sup>  | 27.4 ±1.0 <sup>b</sup>  | 47.5 ±7.4 <sup>ab</sup> |
|           | Dig+S     | 2.85 ±0.24 <sup>a</sup>                     | 0.42 ±0.06               | 7.89 ±0.50 <sup>a</sup>  | 0.60 ±0.02 <sup>ab</sup> | 0.50 ±0.03 <sup>ab</sup> | 2.71 ±0.19 <sup>bc</sup> | 0.12 ±0.004 <sup>ab</sup> | 6.5 ±0.9 <sup>abc</sup>            | 2.01 ±0.12 <sup>a</sup>  | 29.4 ±1.4 <sup>b</sup>  | 39.7 ±5.1 <sup>b</sup>  |
|           | Csl       | 2.88 ±0.22 <sup>a</sup>                     | 0.41 ±0.06               | 8.03 ±0.47 <sup>a</sup>  | 0.62 ±0.02 <sup>a</sup>  | 0.55 ±0.03 <sup>a</sup>  | 2.95 ±0.18 <sup>a</sup>  | 0.11 ±0.004 <sup>ab</sup> | 6.9 ±1.0 <sup>a</sup>              | 2.14 ±0.12 <sup>a</sup>  | 30.6 ±1.3 <sup>b</sup>  | 39.4 ±3.9 <sup>b</sup>  |
|           | NPK       | 2.80 ±0.17 <sup>a</sup>                     | 0.36 ±0.05               | 7.52 ±0.38 <sup>a</sup>  | 0.58 ±0.03 <sup>b</sup>  | 0.46 ±0.02 <sup>b</sup>  | 2.78 ±0.17 <sup>ab</sup> | 0.11 ±0.004 <sup>ab</sup> | 5.2 ±0.6 <sup>c</sup>              | 1.98 ±0.09 <sup>ab</sup> | 29.5 ±1.3 <sup>b</sup>  | 38.2 ±4.6 <sup>b</sup>  |

Treatments with the standard errors of the mean (*SEM*) followed by the same letter were not significantly different at 0.05 probability level.

Table S4. Effect of fertilization treatments on total nutrient uptake by winter wheat (WW) and spring barley (SB) depending on the year

| Year/crop | Treatment | Macronutrients + sodium, kg ha <sup>-1</sup> |                         |                          |                         |                         |                         |                          | Micronutrients, g ha <sup>-1</sup> |                         |                         |                         |
|-----------|-----------|----------------------------------------------|-------------------------|--------------------------|-------------------------|-------------------------|-------------------------|--------------------------|------------------------------------|-------------------------|-------------------------|-------------------------|
|           |           | N                                            | P                       | K                        | Mg                      | S                       | Ca                      | Na                       | Zn                                 | Cu                      | Mn                      | Fe                      |
| 2013/WW   | Control   | 132.7 ±4.9 <sup>b</sup>                      | 26.6 ±0.7 <sup>b</sup>  | 56.8 ±2.6 <sup>b</sup>   | 10.9 ±0.4 <sup>b</sup>  | 10.2 ±0.4 <sup>c</sup>  | 25.1 ±1.0 <sup>b</sup>  | 1.2 ±0.02 <sup>b</sup>   | 193 ±5.1 <sup>c</sup>              | 40.7 ±1.0 <sup>c</sup>  | 398 ±13.6 <sup>b</sup>  | 562 ±34.0               |
|           | Dig       | 203.1 ±0.8 <sup>a</sup>                      | 34.9 ±0.5 <sup>a</sup>  | 85.0 ±4.0 <sup>a</sup>   | 15.6 ±0.3 <sup>a</sup>  | 16.6 ±0.1 <sup>a</sup>  | 35.7 ±1.6 <sup>a</sup>  | 1.6 ±0.07 <sup>a</sup>   | 345 ±11.0 <sup>a</sup>             | 60.2 ±0.7 <sup>a</sup>  | 557 ±16.0 <sup>a</sup>  | 695 ±28.7               |
|           | Dig+S     | 211.0 ±7.9 <sup>a</sup>                      | 36.1 ±0.8 <sup>a</sup>  | 84.4 ±7.4 <sup>a</sup>   | 14.8 ±0.4 <sup>a</sup>  | 15.8 ±0.7 <sup>ab</sup> | 33.4 ±1.8 <sup>a</sup>  | 1.5 ±0.06 <sup>a</sup>   | 314 ±8.4 <sup>a</sup>              | 58.1 ±2.3 <sup>ab</sup> | 518 ±13.9 <sup>a</sup>  | 650 ±34.5               |
|           | Csl       | 202.5 ±4.5 <sup>a</sup>                      | 34.6 ±1.1 <sup>a</sup>  | 86.1 ±5.4 <sup>a</sup>   | 15.1 ±0.5 <sup>a</sup>  | 16.1 ±0.6 <sup>ab</sup> | 34.6 ±1.4 <sup>a</sup>  | 1.5 ±0.04 <sup>a</sup>   | 334 ±6.6 <sup>a</sup>              | 58.7 ±1.1 <sup>ab</sup> | 532 ±18.1 <sup>a</sup>  | 625 ±25.8               |
|           | NPK       | 190.3 ±4.5 <sup>a</sup>                      | 33.7 ±0.5 <sup>a</sup>  | 74.2 ±2.3 <sup>ab</sup>  | 13.9 ±0.3 <sup>a</sup>  | 14.3 ±0.3 <sup>b</sup>  | 31.5 ±1.0 <sup>a</sup>  | 1.4 ±0.05 <sup>a</sup>   | 273 ±2.5 <sup>b</sup>              | 54.0 ±1.0 <sup>b</sup>  | 499 ±14.0 <sup>a</sup>  | 610 ±43.2               |
| 2014/WW   | Control   | 69.9 ±3.6 <sup>c</sup>                       | 21.5 ±0.5 <sup>b</sup>  | 46.6 ±0.7 <sup>b</sup>   | 9.0 ±0.2 <sup>b</sup>   | 7.2 ±0.2 <sup>c</sup>   | 17.1 ±0.5 <sup>c</sup>  | 1.0 ±0.05 <sup>b</sup>   | 127 ±4.7 <sup>c</sup>              | 23.4 ±1.3 <sup>c</sup>  | 399 ±13.3 <sup>b</sup>  | 486 ±73.1 <sup>b</sup>  |
|           | Dig       | 178.0 ±7.4 <sup>a</sup>                      | 36.3 ±0.2 <sup>a</sup>  | 93.6 ±4.0 <sup>a</sup>   | 14.8 ±0.4 <sup>a</sup>  | 14.8 ±0.4 <sup>a</sup>  | 30.5 ±1.1 <sup>a</sup>  | 2.2 ±0.36 <sup>a</sup>   | 261 ±8.7 <sup>a</sup>              | 47.6 ±0.4 <sup>a</sup>  | 567 ±15.0 <sup>a</sup>  | 865 ±126.0 <sup>a</sup> |
|           | Dig+S     | 143.4 ±9.9 <sup>b</sup>                      | 34.8 ±0.5 <sup>a</sup>  | 83.4 ±2.5 <sup>a</sup>   | 13.9 ±0.3 <sup>a</sup>  | 11.7 ±0.3 <sup>b</sup>  | 26.5 ±0.4 <sup>b</sup>  | 1.8 ±0.04 <sup>a</sup>   | 223 ±4.7 <sup>b</sup>              | 40.6 ±1.1 <sup>b</sup>  | 581 ±15.2 <sup>a</sup>  | 576 ±55.6 <sup>ab</sup> |
|           | Csl       | 167.4 ±3.9 <sup>ab</sup>                     | 36.3 ±0.8 <sup>a</sup>  | 91.8 ±3.4 <sup>a</sup>   | 15.0 ±0.2 <sup>a</sup>  | 13.5 ±0.2 <sup>a</sup>  | 32.4 ±1.0 <sup>a</sup>  | 1.9 ±0.04 <sup>a</sup>   | 236 ±9.4 <sup>ab</sup>             | 49.2 ±2.9 <sup>a</sup>  | 612 ±24.8 <sup>a</sup>  | 662 ±12.1 <sup>ab</sup> |
|           | NPK       | 168.1 ±1.9 <sup>ab</sup>                     | 37.5 ±1.9 <sup>a</sup>  | 91.8 ±2.1 <sup>a</sup>   | 14.6 ±0.4 <sup>a</sup>  | 13.4 ±0.5 <sup>a</sup>  | 29.4 ±0.9 <sup>ab</sup> | 1.8 ±0.08 <sup>a</sup>   | 231 ±7.1 <sup>ab</sup>             | 46.9 ±1.0 <sup>ab</sup> | 588 ±21.7 <sup>a</sup>  | 603 ±60.7 <sup>ab</sup> |
| 2015/SB   | Control   | 69.7 ±1.8 <sup>d</sup>                       | 17.1 ±0.3 <sup>b</sup>  | 63.3 ±1.7 <sup>c</sup>   | 8.3 ±0.1 <sup>c</sup>   | 7.6 ±0.1 <sup>c</sup>   | 19.9 ±0.3 <sup>c</sup>  | 2.3 ±0.14 <sup>d</sup>   | 125 ±2.6 <sup>b</sup>              | 27.6 ±0.7 <sup>c</sup>  | 102 ±2.6 <sup>c</sup>   | 180 ±2.7 <sup>c</sup>   |
|           | Dig       | 168.1 ±5.7 <sup>a</sup>                      | 25.5 ±0.7 <sup>a</sup>  | 155.5 ±8.0 <sup>a</sup>  | 13.6 ±0.4 <sup>ab</sup> | 13.7 ±0.5 <sup>a</sup>  | 33.9 ±1.0 <sup>a</sup>  | 12.2 ±1.16 <sup>a</sup>  | 257 ±13.2 <sup>a</sup>             | 56.3 ±2.0 <sup>a</sup>  | 174 ±10.3 <sup>ab</sup> | 362 ±11.9 <sup>a</sup>  |
|           | Dig+S     | 134.0 ±2.4 <sup>b</sup>                      | 26.6 ±0.8 <sup>a</sup>  | 135.4 ±2.8 <sup>ab</sup> | 12.9 ±0.2 <sup>b</sup>  | 11.5 ±0.2 <sup>b</sup>  | 29.5 ±0.6 <sup>b</sup>  | 7.8 ±0.59 <sup>c</sup>   | 230 ±5.1 <sup>a</sup>              | 50.1 ±1.1 <sup>b</sup>  | 149 ±1.4 <sup>b</sup>   | 316 ±6.0 <sup>b</sup>   |
|           | Csl       | 149.7 ±4.4 <sup>bc</sup>                     | 25.3 ±0.4 <sup>a</sup>  | 126.3 ±5.4 <sup>b</sup>  | 12.9 ±0.2 <sup>b</sup>  | 12.6 ±0.3 <sup>ab</sup> | 30.1 ±0.9 <sup>b</sup>  | 8.6 ±1.01 <sup>bc</sup>  | 232 ±4.4 <sup>a</sup>              | 51.1 ±0.8 <sup>ab</sup> | 164 ±2.7 <sup>ab</sup>  | 318 ±0.9 <sup>b</sup>   |
|           | NPK       | 163.0 ±2.5 <sup>ab</sup>                     | 25.8 ±0.4 <sup>a</sup>  | 148.1 ±1.1 <sup>ab</sup> | 13.9 ±0.1 <sup>a</sup>  | 12.9 ±0.2 <sup>a</sup>  | 34.5 ±0.7 <sup>a</sup>  | 11.5 ±0.32 <sup>ab</sup> | 235 ±10.1 <sup>a</sup>             | 56.4 ±1.6 <sup>a</sup>  | 180 ±7.8 <sup>a</sup>   | 358 ±12.5 <sup>a</sup>  |
| 2016/WW   | Control   | 61.2 ±1.7 <sup>b</sup>                       | 16.9 ±0.6 <sup>c</sup>  | 41.6 ±1.3 <sup>b</sup>   | 7.2 ±0.3 <sup>b</sup>   | 5.9 ±0.3 <sup>b</sup>   | 8.9 ±0.6 <sup>b</sup>   | 0.6 ±0.03 <sup>c</sup>   | 94 ±4.1 <sup>c</sup>               | 19.5 ±1.0 <sup>c</sup>  | 302 ±17.9 <sup>b</sup>  | 210 ±6.4 <sup>b</sup>   |
|           | Dig       | 182.4 ±7.8 <sup>a</sup>                      | 30.2 ±0.9 <sup>ab</sup> | 101.5 ±6.3 <sup>a</sup>  | 14.2 ±0.3 <sup>a</sup>  | 15.3 ±0.7 <sup>a</sup>  | 19.0 ±0.6 <sup>a</sup>  | 1.9 ±0.03 <sup>a</sup>   | 192 ±7.8 <sup>a</sup>              | 46.7 ±1.5 <sup>a</sup>  | 494 ±10.4 <sup>a</sup>  | 454 ±5.8 <sup>a</sup>   |
|           | Dig+S     | 159.9 ±6.4 <sup>a</sup>                      | 30.6 ±1.1 <sup>ab</sup> | 93.5 ±4.6 <sup>a</sup>   | 13.5 ±0.4 <sup>a</sup>  | 13.4 ±0.5 <sup>a</sup>  | 17.7 ±0.8 <sup>a</sup>  | 1.4 ±0.06 <sup>b</sup>   | 183 ±6.7 <sup>ab</sup>             | 43.0 ±1.2 <sup>ab</sup> | 493 ±19.1 <sup>a</sup>  | 410 ±20.4 <sup>a</sup>  |
|           | Csl       | 167.6 ±7.6 <sup>a</sup>                      | 31.8 ±1.1 <sup>a</sup>  | 95.1 ±7.2 <sup>a</sup>   | 14.2 ±0.4 <sup>a</sup>  | 15.1 ±0.9 <sup>a</sup>  | 19.4 ±1.3 <sup>a</sup>  | 1.3 ±0.09 <sup>b</sup>   | 195 ±11.2 <sup>a</sup>             | 45.9 ±1.6 <sup>a</sup>  | 545 ±20.7 <sup>a</sup>  | 447 ±15.9 <sup>a</sup>  |
|           | NPK       | 170.7 ±3.6 <sup>a</sup>                      | 27.3 ±0.9 <sup>b</sup>  | 85.6 ±2.6 <sup>a</sup>   | 12.8 ±0.4 <sup>a</sup>  | 13.5 ±0.3 <sup>a</sup>  | 17.7 ±0.7 <sup>a</sup>  | 1.2 ±0.04 <sup>b</sup>   | 153 ±8.5 <sup>b</sup>              | 39.4 ±1.3 <sup>b</sup>  | 476 ±36.3 <sup>a</sup>  | 404 ±21.7 <sup>a</sup>  |
| mean/WW   | Control   | 87.9 ±9.8 <sup>c</sup>                       | 21.7 ±1.2 <sup>b</sup>  | 48.3 ±2.1 <sup>b</sup>   | 9.0 ±0.5 <sup>c</sup>   | 7.8 ±0.6 <sup>c</sup>   | 17.0 ±2.0 <sup>d</sup>  | 0.9 ±0.07 <sup>c</sup>   | 138 ±12.7 <sup>d</sup>             | 27.9 ±2.8 <sup>c</sup>  | 366 ±15.8 <sup>b</sup>  | 419 ±51.7 <sup>c</sup>  |
|           | Dig       | 187.9 ±4.6 <sup>a</sup>                      | 33.8 ±0.8 <sup>a</sup>  | 93.4 ±3.3 <sup>a</sup>   | 14.9 ±0.3 <sup>a</sup>  | 15.6 ±0.3 <sup>a</sup>  | 28.4 ±2.2 <sup>ab</sup> | 1.9 ±0.14 <sup>a</sup>   | 266 ±19.4 <sup>a</sup>             | 51.5 ±1.9 <sup>a</sup>  | 539 ±12.3 <sup>a</sup>  | 671 ±64.1 <sup>a</sup>  |
|           | Dig+S     | 171.4 ±9.7 <sup>b</sup>                      | 33.8 ±0.8 <sup>a</sup>  | 87.1 ±3.0 <sup>a</sup>   | 14.1 ±0.2 <sup>ab</sup> | 13.6 ±0.6 <sup>b</sup>  | 25.9 ±2.0 <sup>c</sup>  | 1.6 ±0.07 <sup>b</sup>   | 240 ±16.9 <sup>b</sup>             | 47.2 ±2.5 <sup>b</sup>  | 531 ±14.0 <sup>a</sup>  | 546 ±36.6 <sup>b</sup>  |
|           | Csl       | 179.2 ±5.8 <sup>ab</sup>                     | 34.2 ±0.8 <sup>a</sup>  | 91.0 ±3.1 <sup>a</sup>   | 14.8 ±0.2 <sup>a</sup>  | 14.9 ±0.4 <sup>a</sup>  | 28.8 ±2.1 <sup>a</sup>  | 1.6 ±0.08 <sup>b</sup>   | 255 ±18.3 <sup>ab</sup>            | 51.3 ±1.9 <sup>a</sup>  | 563 ±15.4 <sup>a</sup>  | 578 ±29.9 <sup>ab</sup> |
|           | NPK       | 176.4 ±3.5 <sup>ab</sup>                     | 32.8 ±1.4 <sup>a</sup>  | 83.9 ±2.5 <sup>a</sup>   | 13.8 ±0.3 <sup>b</sup>  | 13.7 ±0.2 <sup>b</sup>  | 26.2 ±1.9 <sup>bc</sup> | 1.5 ±0.08 <sup>b</sup>   | 219 ±15.4 <sup>c</sup>             | 46.8 ±1.9 <sup>b</sup>  | 521 ±19.8 <sup>a</sup>  | 539 ±37.1 <sup>b</sup>  |

Treatments with the standard errors of the mean (*SEM*) followed by the same letter were not significantly different at 0.05 probability level.

Table S5. Effect of fertilization treatments on nutrient harvest indices, NuHI (%)

| Year/crop | Treatment | Macronutrients + sodium |                         |                         |                         |                         |                         | Micronutrients         |                         |                          |                         |                         |
|-----------|-----------|-------------------------|-------------------------|-------------------------|-------------------------|-------------------------|-------------------------|------------------------|-------------------------|--------------------------|-------------------------|-------------------------|
|           |           | N                       | P                       | K                       | Mg                      | S                       | Ca                      | Na                     | Zn                      | Cu                       | Mn                      | Fe                      |
| 2013/WW   | Control   | 91.1 ±0.3 <sup>a</sup>  | 92.0 ±0.6 <sup>a</sup>  | 47.2 ±1.9 <sup>a</sup>  | 72.8 ±0.4               | 78.3 ±0.8               | 36.4 ±1.1               | 54.7 ±0.8              | 85.4 ±0.9 <sup>a</sup>  | 75.1 ±0.8                | 68.0 ±0.5               | 37.9 ±3.0               |
|           | Dig       | 87.0 ±0.6 <sup>b</sup>  | 87.5 ±0.7 <sup>b</sup>  | 35.9 ±1.6 <sup>b</sup>  | 69.2 ±0.6               | 74.3 ±0.8               | 32.3 ±1.5               | 51.1 ±2.3              | 81.3 ±1.4 <sup>ab</sup> | 72.7 ±0.5                | 69.0 ±1.4               | 47.5 ±1.9               |
|           | Dig+S     | 88.2 ±0.9 <sup>ab</sup> | 88.0 ±1.1 <sup>b</sup>  | 37.3 ±2.9 <sup>b</sup>  | 70.1 ±1.0               | 74.4 ±2.3               | 33.3 ±1.3               | 51.7 ±1.6              | 80.3 ±1.0 <sup>ab</sup> | 72.6 ±1.7                | 69.7 ±0.8               | 49.0 ±2.3               |
|           | Csl       | 87.6 ±1.1 <sup>b</sup>  | 87.6 ±1.0 <sup>b</sup>  | 34.3 ±1.7 <sup>b</sup>  | 69.5 ±1.4               | 74.0 ±2.0               | 31.7 ±1.5               | 50.3 ±1.6              | 77.7 ±2.6 <sup>b</sup>  | 72.4 ±1.4                | 68.5 ±2.0               | 50.8 ±1.4               |
|           | NPK       | 88.8 ±0.2 <sup>ab</sup> | 89.2 ±0.6 <sup>ab</sup> | 39.6 ±1.4 <sup>ab</sup> | 70.9 ±0.6               | 77.2 ±0.6               | 33.9 ±0.9               | 50.7 ±0.4              | 84.2 ±0.7 <sup>a</sup>  | 74.4 ±0.6                | 69.7 ±0.5               | 48.5 ±3.1               |
| 2014/WW   | Control   | 86.3 ±0.6               | 90.7 ±0.3 <sup>b</sup>  | 53.1 ±1.0 <sup>a</sup>  | 68.2 ±0.8 <sup>c</sup>  | 65.9 ±0.5 <sup>b</sup>  | 24.3 ±0.4 <sup>ab</sup> | 53.0 ±1.8              | 76.8 ±1.4               | 62.2 ±1.9                | 47.4 ±1.2 <sup>b</sup>  | 30.2 ±2.0 <sup>b</sup>  |
|           | Dig       | 87.6 ±0.6               | 92.6 ±0.8 <sup>ab</sup> | 44.4 ±1.5 <sup>b</sup>  | 71.7 ±1.2 <sup>ab</sup> | 75.2 ±1.3 <sup>a</sup>  | 23.9 ±1.2 <sup>ab</sup> | 45.5 ±4.8              | 77.7 ±1.9               | 66.4 ±1.1                | 57.5 ±1.2 <sup>a</sup>  | 37.0 ±5.3 <sup>a</sup>  |
|           | Dig+S     | 87.6 ±0.9               | 92.6 ±0.3 <sup>ab</sup> | 47.9 ±0.7 <sup>ba</sup> | 72.7 ±0.2 <sup>ab</sup> | 73.7 ±0.3 <sup>a</sup>  | 25.9 ±0.8 <sup>a</sup>  | 50.4 ±2.6              | 79.1 ±2.4               | 65.0 ±1.1                | 56.9 ±2.6 <sup>a</sup>  | 39.5 ±3.7 <sup>a</sup>  |
|           | Csl       | 88.1 ±0.8               | 92.8 ±0.5 <sup>ab</sup> | 45.3 ±1.4 <sup>b</sup>  | 70.0 ±0.4 <sup>bc</sup> | 74.1 ±0.7 <sup>a</sup>  | 22.1 ±0.5 <sup>b</sup>  | 50.3 ±1.2              | 80.7 ±1.3 <sup>b</sup>  | 62.9 ±2.2                | 54.9 ±0.9 <sup>a</sup>  | 38.5 ±1.0 <sup>a</sup>  |
|           | NPK       | 88.0 ±0.5               | 93.5 ±0.6 <sup>a</sup>  | 46.8 ±2.0 <sup>b</sup>  | 73.9 ±0.8 <sup>a</sup>  | 75.3 ±1.0 <sup>a</sup>  | 24.1 ±0.7 <sup>ab</sup> | 50.0 ±1.8              | 81.4 ±1.3               | 65.5 ±1.4                | 59.6 ±0.5 <sup>a</sup>  | 46.4 ±1.8 <sup>a</sup>  |
| 2015/SB   | Control   | 87.5 ±0.6 <sup>a</sup>  | 91.9 ±0.7               | 37.4 ±0.8 <sup>a</sup>  | 74.2 ±0.7 <sup>a</sup>  | 61.7 ±1.7 <sup>b</sup>  | 24.6 ±0.9 <sup>a</sup>  | 27.7 ±1.2 <sup>a</sup> | 90.1 ±0.1 <sup>a</sup>  | 76.9 ±0.7 <sup>ab</sup>  | 58.6 ±1.4 <sup>ab</sup> | 69.7 ±1.4               |
|           | Dig       | 81.3 ±1.0 <sup>b</sup>  | 91.0 ±0.9               | 23.9 ±0.7 <sup>b</sup>  | 70.3 ±0.4 <sup>bc</sup> | 67.5 ±1.3 <sup>a</sup>  | 22.3 ±0.9 <sup>ab</sup> | 10.7 ±0.7 <sup>b</sup> | 86.0 ±0.4 <sup>ab</sup> | 72.8 ±0.5 <sup>c</sup>   | 53.8 ±1.0 <sup>b</sup>  | 69.6 ±1.1               |
|           | Dig+S     | 86.7 ±0.9 <sup>a</sup>  | 93.1 ±0.5               | 28.6 ±1.0 <sup>b</sup>  | 75.0 ±0.2 <sup>a</sup>  | 72.2 ±0.8 <sup>a</sup>  | 25.5 ±0.3 <sup>a</sup>  | 14.5 ±1.3 <sup>b</sup> | 88.4 ±1.2 <sup>ab</sup> | 78.4 ±1.1 <sup>a</sup>   | 60.9 ±1.0 <sup>a</sup>  | 73.1 ±2.5               |
|           | Csl       | 84.2 ±0.9 <sup>ab</sup> | 93.4 ±0.6               | 29.3 ±1.6 <sup>b</sup>  | 72.5 ±0.8 <sup>ab</sup> | 69.9 ±1.5 <sup>a</sup>  | 24.2 ±1.4 <sup>ab</sup> | 13.8 ±1.6 <sup>b</sup> | 87.3 ±0.3 <sup>ab</sup> | 74.1 ±1.2 <sup>bc</sup>  | 53.4 ±1.1 <sup>b</sup>  | 72.6 ±1.0               |
|           | NPK       | 84.9 ±0.7 <sup>a</sup>  | 92.8 ±0.4               | 25.3 ±0.6 <sup>b</sup>  | 69.7 ±0.8 <sup>c</sup>  | 70.6 ±0.6 <sup>a</sup>  | 21.7 ±0.6 <sup>b</sup>  | 10.5 ±0.4 <sup>b</sup> | 87.8 ±0.9 <sup>ab</sup> | 75.5 ±0.4 <sup>abc</sup> | 53.5 ±1.9 <sup>b</sup>  | 68.6 ±1.6               |
| 2016/WW   | Control   | 90.5 ±0.5               | 94.2 ±0.6               | 49.0 ±0.7 <sup>a</sup>  | 71.3 ±1.1               | 71.8 ±1.6 <sup>c</sup>  | 31.3 ±1.2               | 57.1 ±1.1              | 84.6 ±0.6 <sup>b</sup>  | 75.5 ±0.8                | 55.2 ±1.3 <sup>c</sup>  | 62.9 ±2.5 <sup>b</sup>  |
|           | Dig       | 91.1 ±0.3               | 95.7 ±0.2               | 32.8 ±1.6 <sup>b</sup>  | 72.0 ±0.2               | 78.4 ±0.3 <sup>ab</sup> | 29.0 ±0.4               | 54.8 ±5.2              | 88.7 ±0.5 <sup>a</sup>  | 75.5 ±0.4                | 63.2 ±0.6 <sup>a</sup>  | 69.7 ±1.6 <sup>a</sup>  |
|           | Dig+S     | 91.1 ±0.6               | 95.3 ±0.5               | 35.6 ±1.3 <sup>b</sup>  | 72.0 ±0.7               | 79.0 ±1.3 <sup>ab</sup> | 28.9 ±1.5               | 49.0 ±2.5              | 88.4 ±0.3 <sup>a</sup>  | 76.5 ±1.0                | 62.0 ±1.1 <sup>ab</sup> | 70.8 ±1.4 <sup>a</sup>  |
|           | Csl       | 90.8 ±0.8               | 95.1 ±0.4               | 37.0 ±2.7 <sup>b</sup>  | 72.0 ±1.2               | 74.9 ±2.0 <sup>bc</sup> | 28.1 ±1.5               | 53.3 ±3.9              | 87.3 ±0.7 <sup>a</sup>  | 76.1 ±1.0                | 61.7 ±1.8 <sup>ab</sup> | 69.3 ±0.6 <sup>ab</sup> |
|           | NPK       | 91.7 ±0.3               | 95.8 ±0.3               | 35.5 ±0.4 <sup>b</sup>  | 71.4 ±0.6               | 81.1 ±0.4 <sup>a</sup>  | 27.5 ±0.8               | 51.0 ±2.0              | 88.2 ±0.4 <sup>a</sup>  | 74.8 ±0.9                | 56.7 ±1.4 <sup>bc</sup> | 67.9 ±0.9 <sup>ab</sup> |
| mean/WW   | Control   | 89.3 ±0.7               | 92.3 ±0.5               | 49.8 ±1.0 <sup>a</sup>  | 70.7 ±1.6               | 72.0 ±1.6 <sup>c</sup>  | 30.7 ±0.9 <sup>a</sup>  | 55.0 ±0.9              | 82.3 ±1.3               | 70.9 ±2.0                | 56.9 ±2.6 <sup>b</sup>  | 43.7 ±4.4 <sup>b</sup>  |
|           | Dig       | 88.6 ±0.6               | 91.9 ±1.1               | 37.7 ±1.7 <sup>b</sup>  | 71.0 ±0.8               | 75.9 ±1.2 <sup>ab</sup> | 28.4 ±2.5 <sup>ab</sup> | 50.5 ±2.5              | 82.6 ±1.6               | 71.5 ±1.2                | 63.2 ±1.5 <sup>a</sup>  | 51.4 ±4.5 <sup>a</sup>  |
|           | Dig+S     | 89.0 ±0.5               | 92.0 ±0.9               | 40.3 ±1.6 <sup>b</sup>  | 71.6 ±0.8               | 75.7 ±1.3 <sup>ab</sup> | 29.4 ±0.8 <sup>ab</sup> | 50.3 ±0.8              | 82.6 ±1.0               | 71.3 ±1.4                | 62.9 ±1.7 <sup>a</sup>  | 53.1 ±3.1 <sup>a</sup>  |
|           | Csl       | 88.8 ±0.6               | 91.8 ±1.0               | 38.9 ±1.9 <sup>b</sup>  | 70.5 ±1.1               | 74.3 ±1.1 <sup>bc</sup> | 27.3 ±1.2 <sup>b</sup>  | 51.3 ±1.2              | 81.9 ±1.5               | 70.5 ±1.6                | 61.7 ±1.8 <sup>a</sup>  | 52.8 ±4.2 <sup>a</sup>  |
|           | NPK       | 89.5 ±0.6               | 92.8 ±1.0               | 40.7 ±1.7 <sup>b</sup>  | 72.0 ±1.4               | 77.9 ±1.4 <sup>a</sup>  | 28.5 ±1.4 <sup>ab</sup> | 50.6 ±1.4              | 84.6 ±1.5               | 71.6 ±1.9                | 62.0 ±1.9 <sup>a</sup>  | 54.3 ±3.9 <sup>a</sup>  |

Treatments with the standard errors of the mean (*SEM*) followed by the same letter were not significantly different at 0.05 probability level.

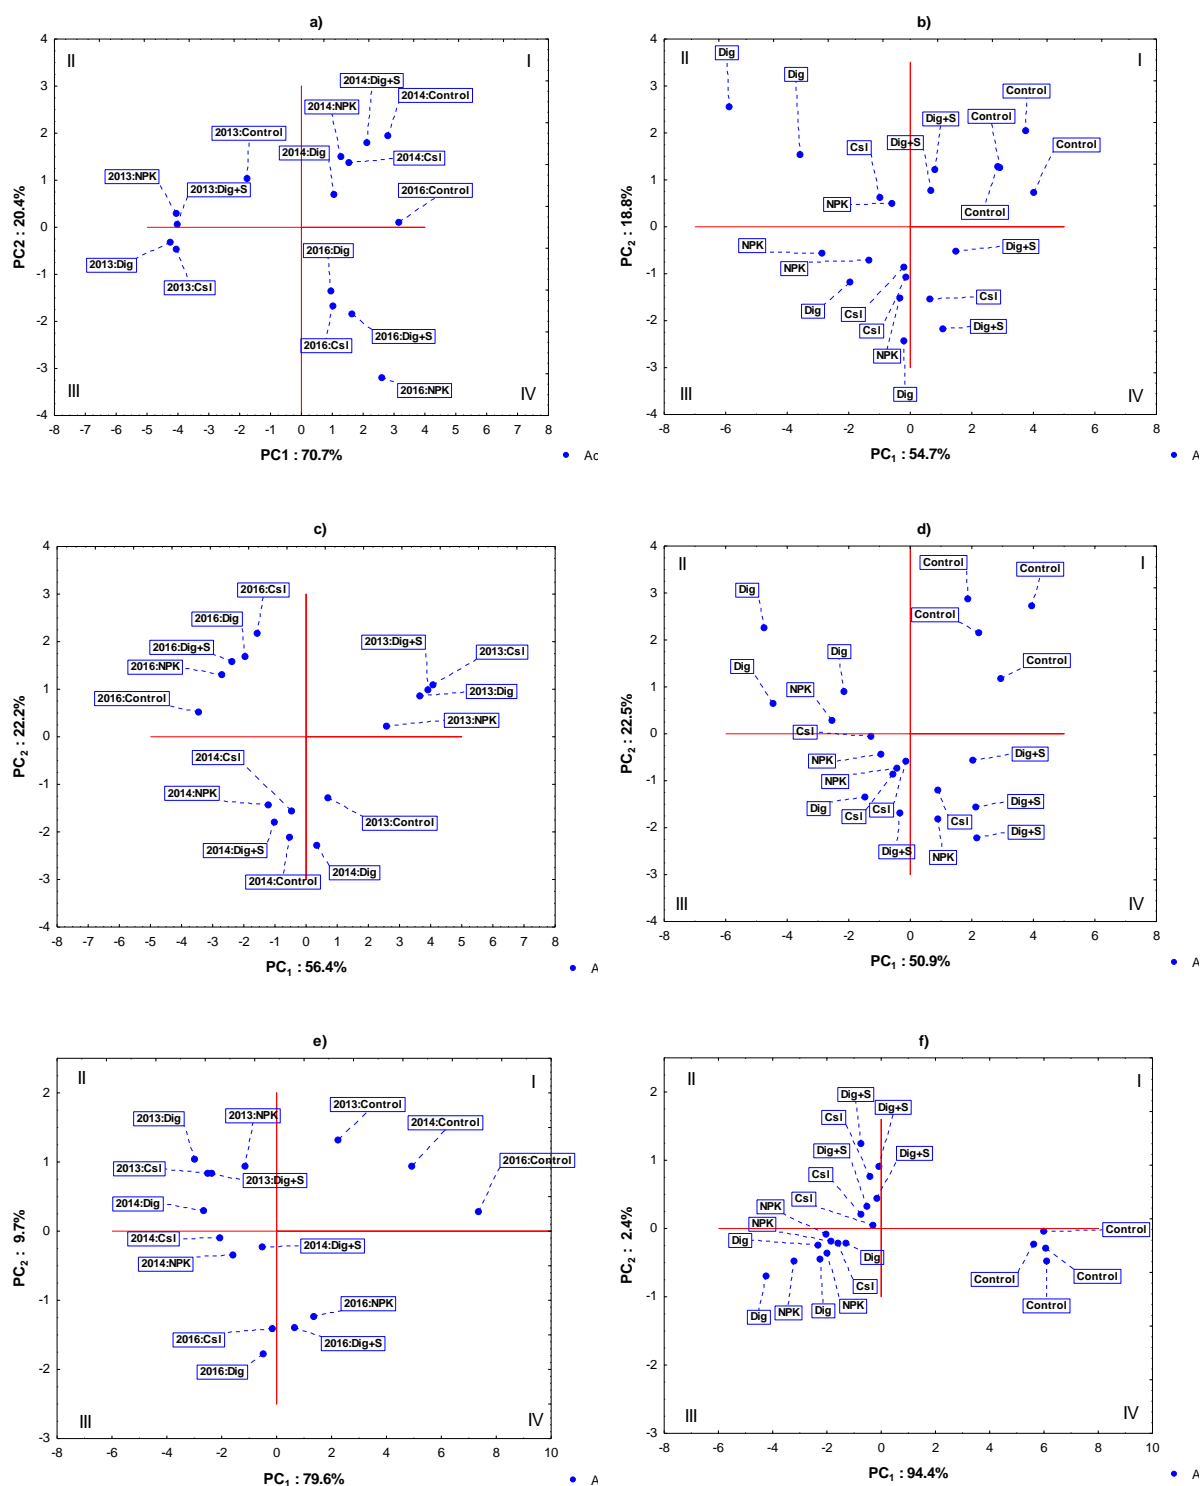

Figure S2. Projection of the cases (treatments) on the factor-plane for nutrient content in grain of winter wheat (a) and spring barley (b), nutrient content in straw of winter wheat (c) and spring barley (d), and for total nutrient uptake by of winter wheat (e) and spring barley (f). Treatments: Control – without fertilization, Dig – digestate, Dig+S – digestate + straw, Csl – cattle slurry, NPK – mineral fertilization.
